# Supplementary material
Source: HighWire-hosted journal article supplement (https://diabetes.diabetesjournals.org/content/suppl/2007/08/23/db07-0075)
Supplement: dc070075OnlineAppenTable1.pdf [file dc070075OnlineAppenTable1.pdf]

**Table 1**

| <b>Group</b>     | <b>Time (h)</b> | <b>Plasma FFA (<math>\mu\text{mol}\cdot\text{l}^{-1}</math>)</b> | <b>Significance (vs. SAL)</b> |
|------------------|-----------------|------------------------------------------------------------------|-------------------------------|
| <b>SAL</b>       | 0               | 634±67                                                           | -                             |
|                  | 18              | 489±73                                                           | -                             |
|                  | 24              | 407±70                                                           | -                             |
|                  | 48              | 693±26                                                           | -                             |
| <b>OLE</b>       | 0               | 646±67                                                           | NS                            |
|                  | 18              | 773±92                                                           | p<0.001                       |
|                  | 24              | 864±103                                                          | p<0.001                       |
|                  | 48              | 1050±118                                                         | p<0.001                       |
| <b>OLE+L-NAC</b> | 0               | 682±79                                                           | NS                            |
|                  | 18              | 1233±123                                                         | p<0.001                       |
|                  | 24              | 1170±145                                                         | p<0.001                       |
|                  | 48              | 1128±110                                                         | p<0.001                       |
| <b>OLE+H-NAC</b> | 0               | 660±102                                                          | NS                            |
|                  | 18              | 864±58                                                           | p<0.001                       |
|                  | 24              | 760±81                                                           | p<0.001                       |
|                  | 48              | 1003±92                                                          | p<0.001                       |
| <b>OLE+TAU</b>   | 0               | 759±89                                                           | NS                            |
|                  | 18              | 992±71                                                           | p<0.001                       |
|                  | 24              | 925±88                                                           | p<0.001                       |
|                  | 48              | 1158±84                                                          | p<0.001                       |
| <b>L-NAC</b>     | 0               | 589±38                                                           | NS                            |
|                  | 18              | 729±94                                                           | NS                            |
|                  | 24              | 676±86                                                           | NS                            |
|                  | 48              | 625±61                                                           | NS                            |
| <b>H-NAC</b>     | 0               | 787±86                                                           | NS                            |
|                  | 18              | 665±87                                                           | NS                            |
|                  | 24              | 560±70                                                           | NS                            |
|                  | 48              | 654±69                                                           | NS                            |
| <b>TAU</b>       | 0               | 811±60                                                           | NS                            |
|                  | 18              | 638±71                                                           | NS                            |
|                  | 24              | 634±71                                                           | NS                            |
|                  | 48              | 805±28                                                           | NS                            |
